# Supplementary material for: Diagnosis and prognosis of myocardial infarction on a plasmonic chip
Source: PubMed Central journal article supplement (PMC7125217; doi:10.1038/s41467-020-15487-3), 2020-04-03
Supplement: 41467_2020_15487_MOESM2_ESM.pdf [file 41467_2020_15487_MOESM2_ESM.pdf]

## Reporting Summary

Nature Research wishes to improve the reproducibility of the work that we publish. This form provides structure for consistency and transparency in reporting. For further information on Nature Research policies, see [Authors & Referees](#) and the [Editorial Policy Checklist](#).

### Statistics

For all statistical analyses, confirm that the following items are present in the figure legend, table legend, main text, or Methods section.

n/a Confirmed

- |                                     |                                     |                                                                                                                                                                                                                                                            |
|-------------------------------------|-------------------------------------|------------------------------------------------------------------------------------------------------------------------------------------------------------------------------------------------------------------------------------------------------------|
| <input type="checkbox"/>            | <input checked="" type="checkbox"/> | The exact sample size ( $n$ ) for each experimental group/condition, given as a discrete number and unit of measurement                                                                                                                                    |
| <input type="checkbox"/>            | <input checked="" type="checkbox"/> | A statement on whether measurements were taken from distinct samples or whether the same sample was measured repeatedly                                                                                                                                    |
| <input type="checkbox"/>            | <input checked="" type="checkbox"/> | The statistical test(s) used AND whether they are one- or two-sided<br><i>Only common tests should be described solely by name; describe more complex techniques in the Methods section.</i>                                                               |
| <input type="checkbox"/>            | <input checked="" type="checkbox"/> | A description of all covariates tested                                                                                                                                                                                                                     |
| <input type="checkbox"/>            | <input checked="" type="checkbox"/> | A description of any assumptions or corrections, such as tests of normality and adjustment for multiple comparisons                                                                                                                                        |
| <input type="checkbox"/>            | <input checked="" type="checkbox"/> | A full description of the statistical parameters including central tendency (e.g. means) or other basic estimates (e.g. regression coefficient) AND variation (e.g. standard deviation) or associated estimates of uncertainty (e.g. confidence intervals) |
| <input type="checkbox"/>            | <input checked="" type="checkbox"/> | For null hypothesis testing, the test statistic (e.g. $F$ , $t$ , $r$ ) with confidence intervals, effect sizes, degrees of freedom and $P$ value noted<br><i>Give <math>P</math> values as exact values whenever suitable.</i>                            |
| <input checked="" type="checkbox"/> | <input type="checkbox"/>            | For Bayesian analysis, information on the choice of priors and Markov chain Monte Carlo settings                                                                                                                                                           |
| <input checked="" type="checkbox"/> | <input type="checkbox"/>            | For hierarchical and complex designs, identification of the appropriate level for tests and full reporting of outcomes                                                                                                                                     |
| <input type="checkbox"/>            | <input checked="" type="checkbox"/> | Estimates of effect sizes (e.g. Cohen's $d$ , Pearson's $r$ ), indicating how they were calculated                                                                                                                                                         |

*Our web collection on [statistics for biologists](#) contains articles on many of the points above.*

### Software and code

Policy information about [availability of computer code](#)

Data collection

Image Studio Version 3.1.4

Data analysis

SPSS software (version 19.0)  
Origin (version 8.0)

For manuscripts utilizing custom algorithms or software that are central to the research but not yet described in published literature, software must be made available to editors/reviewers. We strongly encourage code deposition in a community repository (e.g. GitHub). See the Nature Research [guidelines for submitting code & software](#) for further information.

### Data

Policy information about [availability of data](#)

All manuscripts must include a [data availability statement](#). This statement should provide the following information, where applicable:

- Accession codes, unique identifiers, or web links for publicly available datasets
- A list of figures that have associated raw data
- A description of any restrictions on data availability

The datasets obtained and analyzed during the current study are available from the corresponding authors upon reasonable request. The source data for Figs. 1b, 2b-c, e-f, 3a&c, 4b&d, and 5, and Supplementary Figs. 2a-b, 3, 4, 5b, and 6 were provided as a Source Data file.

## Field-specific reporting

Please select the one below that is the best fit for your research. If you are not sure, read the appropriate sections before making your selection.

Life sciences  Behavioural & social sciences  Ecological, evolutionary & environmental sciences

For a reference copy of the document with all sections, see [nature.com/documents/nr-reporting-summary-flat.pdf](https://www.nature.com/documents/nr-reporting-summary-flat.pdf)

## Life sciences study design

All studies must disclose on these points even when the disclosure is negative.

|                 |                                                                                                                                                                                   |
|-----------------|-----------------------------------------------------------------------------------------------------------------------------------------------------------------------------------|
| Sample size     | We estimated the sufficient sample size with one-sample sensitivity and specificity analysis (sensitivity=0.9, specificity=0.9).                                                  |
| Data exclusions | No data were excluded from our analyses.                                                                                                                                          |
| Replication     | We performed three independent experiments and data are shown as the mean $\pm$ s.d. (n=3)                                                                                        |
| Randomization   | The participants were allocated randomly.                                                                                                                                         |
| Blinding        | The pathologists were blind to participants' clinical information and any other information about the acquisition results from plasmonic gold nano-island (pGold) chip detection. |

## Reporting for specific materials, systems and methods

We require information from authors about some types of materials, experimental systems and methods used in many studies. Here, indicate whether each material, system or method listed is relevant to your study. If you are not sure if a list item applies to your research, read the appropriate section before selecting a response.

### Materials & experimental systems

|                                     |                                                                 |
|-------------------------------------|-----------------------------------------------------------------|
| n/a                                 | Involvement in the study                                        |
| <input type="checkbox"/>            | <input checked="" type="checkbox"/> Antibodies                  |
| <input checked="" type="checkbox"/> | <input type="checkbox"/> Eukaryotic cell lines                  |
| <input checked="" type="checkbox"/> | <input type="checkbox"/> Palaeontology                          |
| <input checked="" type="checkbox"/> | <input type="checkbox"/> Animals and other organisms            |
| <input type="checkbox"/>            | <input checked="" type="checkbox"/> Human research participants |
| <input checked="" type="checkbox"/> | <input type="checkbox"/> Clinical data                          |

### Methods

|                                     |                                                 |
|-------------------------------------|-------------------------------------------------|
| n/a                                 | Involvement in the study                        |
| <input checked="" type="checkbox"/> | <input type="checkbox"/> ChIP-seq               |
| <input checked="" type="checkbox"/> | <input type="checkbox"/> Flow cytometry         |
| <input checked="" type="checkbox"/> | <input type="checkbox"/> MRI-based neuroimaging |

## Antibodies

|                 |                                                                                                                                                                                                                                                                                                                                                                                                                                                                                                           |
|-----------------|-----------------------------------------------------------------------------------------------------------------------------------------------------------------------------------------------------------------------------------------------------------------------------------------------------------------------------------------------------------------------------------------------------------------------------------------------------------------------------------------------------------|
| Antibodies used | Capture antibodies for cTnI (cat. # 14T21, mAb: M18, mouse, 3 $\mu$ M), for CK-MB (mAb: 1C11, mouse, 3 $\mu$ M), Detection antibodies for cTnI (cat. # 14T21, mAb: 19C7, mouse, 10 $\times$ 10 <sup>-9</sup> M), for CK-MB (mAb: 1D10, mouse, 10 $\times$ 10 <sup>-9</sup> M)                                                                                                                                                                                                                             |
| Validation      | Detection and capture antibodies for cTnI/CK-MB were obtained from Shanghai Tellgen Life Science Company. Detection and capture antibodies for cTnI were also quality control tested and analyzed by HyTest (Shanghai) Ltd. ( <a href="https://www.hytest.fi/home">https://www.hytest.fi/home</a> )<br>Detection and capture antibodies for CK-MB were also quality control tested and analyzed by Fapon Biotech Inc. ( <a href="http://en.diagnostics.fapon.com/">http://en.diagnostics.fapon.com/</a> ) |

## Human research participants

Policy information about [studies involving human research participants](#)

|                            |                                                                                                                                                                                                                                                                                                                                                                                                                                                                                                                                                                                                                                                                                                                                            |
|----------------------------|--------------------------------------------------------------------------------------------------------------------------------------------------------------------------------------------------------------------------------------------------------------------------------------------------------------------------------------------------------------------------------------------------------------------------------------------------------------------------------------------------------------------------------------------------------------------------------------------------------------------------------------------------------------------------------------------------------------------------------------------|
| Population characteristics | For diagnostic application, MI serum samples were from 112 MI patients (75 males and 37 females) with a median age of 64.39, who were diagnosed without malignant tumor, autoimmune disorders, severe infectious diseases, trauma, heart diseases, and other major diseases. Control serum samples were collected from 112 healthy controls (81 males and 31 females) with a median age of 61.66, who were diagnosed without MI and other major diseases. No significant age difference was observed among all groups (p=0.297 by Student's t-test). Gender was also matched for controls and patients (p=0.468 by Fisher's exact test). Patients/controls known to have other medical conditions (such as active bleeding) were excluded. |
| Recruitment                | Subjects were consecutively recruited in Shanghai Chest Hospital. All patients were diagnosed by the 99th percentile of cTnI, clinical manifestation, ECG, and angiography according to the current NSTEMI-ACS ESC guidelines. The pathologists were blind to any information about the acquisition results from plasmonic gold nano-island (pGold) chip detection. Patients were excluded                                                                                                                                                                                                                                                                                                                                                 |

from the study if they were diagnosed with malignant tumor, autoimmune disorders, severe infectious diseases, trauma, heart diseases, and other major diseases.

#### Ethics oversight

All of the investigation protocols in this study were approved by the institutional ethics committees of the Shanghai Chest Hospital, Shanghai Jiao Tong University (reference No. KS(P)1703).

Note that full information on the approval of the study protocol must also be provided in the manuscript.
